# Supplementary material
Source: publisher figshare collection journal article supplement (https://diabetesjournals.figshare.com/ndownloader/files/26180723)
Supplement: Supplementary file 1 [file 26180723]

Supplementary Table S1. Univariate logistic regression analysis of composite outcomes of COVID-19.

|                            | Odds ratios (95% confidence interval) | P     |
|----------------------------|---------------------------------------|-------|
| Age                        | 1.01 (0.94–1.07)                      | 0.855 |
| Sex (men)                  | 1.64 (0.41–6.56)                      | 0.487 |
| Current smoker             | -                                     | -     |
| Heart rate                 | 1.01 (0.95–1.07)                      | 0.829 |
| Respiratory rate           | 1.04 (0.79–1.37)                      | 0.765 |
| Systolic BP                | 1.07 (1.01–1.14)                      | 0.047 |
| Diastolic BP               | 1.03 (0.99–1.07)                      | 0.113 |
| Symptoms on admission      |                                       |       |
| Fever                      | 1.33 (0.33–5.39)                      | 0.687 |
| Cough                      | 4.00 (0.86–18.6)                      | 0.078 |
| Chest tightness            | 1.63 (0.41–6.39)                      | 0.487 |
| Fatigue                    | 2.04 (0.51–8.23)                      | 0.316 |
| Gastrointestinal symptoms  | -                                     | -     |
| Comorbidities on admission |                                       |       |
| Hypertension               | 1.00 (0.26–3.92)                      | 1.000 |
| Dyslipidemia               | 0.62 (0.10–3.91)                      | 0.607 |
| Coronary heart disease     | 1.41 (1.04–4.34)                      | 0.455 |
| Stroke                     | -                                     | -     |
| COPD                       | -                                     | -     |

|                              |                  |       |
|------------------------------|------------------|-------|
| CKD                          | 0.64 (0.05–7.83) | 0.729 |
| Hepatic diseases             | -                | -     |
| Laboratory measurements      |                  |       |
| Fasting glucose level        | 1.07 (0.86–1.33) | 0.561 |
| Hemoglobin A <sub>1c</sub>   | 1.24 (0.76–2.01) | 0.391 |
| Alanine transaminase         | 1.00 (0.96–1.04) | 0.848 |
| Aspartate Aminotransferase   | 0.99 (0.92–1.06) | 0.711 |
| Triglyceride                 | 0.87 (0.58–1.31) | 0.500 |
| LDL cholesterol              | 1.46 (0.65–3.27) | 0.355 |
| HDL cholesterol              | 0.72 (0.02–21.0) | 0.846 |
| eGFR                         | 1.00 (0.99–1.01) | 0.764 |
| Uric acid                    | 0.99 (0.99–1.00) | 0.125 |
| CRP                          | 0.91 (0.73–1.14) | 0.407 |
| BNP                          | 1.05 (1.02–1.08) | 0.004 |
| IL-6                         | 1.90 (1.27–2.16) | 0.007 |
| Mean sensor glucose          | 1.71 (0.84–2.49) | 0.218 |
| Glucose-lowering medications | 3.50 (0.35–35.1) | 0.287 |
| BP-lowering medications      | 1.24 (0.31–4.93) | 0.762 |
| Lipid-lowering medications   | -                | -     |
| Use of glucocorticoid        | 0.29 (0.03–2.87) | 0.287 |

BNP, brain natriuretic peptide; BP, blood pressure; CKD, chronic kidney disease; COPD, chronic obstructive pulmonary disease; CRP, C-reactive protein; GFR, glomerular filtration rate; HDL, high

density lipoprotein; IL-6, interleukin-6; LDL, low density lipoprotein.

Supplementary Table S2. Logistic regression analysis of a prolonged hospitalization (over 30 days) with different metrics derived from CGM.

|                              | Model 1          | Model 2          |
|------------------------------|------------------|------------------|
| Sensor glucose levels, mg/dL |                  |                  |
| TAR                          |                  |                  |
| >140                         | 1.01 (0.98–1.04) | 1.00 (0.95–1.04) |
| >150                         | 1.02 (0.99–1.05) | 1.01 (0.95–1.06) |
| >160                         | 1.03 (1.01–1.06) | 1.02 (1.01–1.04) |
| >170                         | 1.04 (1.01–1.07) | 1.03 (1.01–1.05) |
| >180                         | 1.04 (1.01–1.08) | 1.04 (1.02–1.06) |
| >190                         | 1.05 (1.01–1.09) | 1.04 (1.02–1.07) |
| >200                         | 1.05 (1.01–1.10) | 1.05 (1.02–1.09) |
| TBR                          |                  |                  |
| <70                          | 1.17 (1.04–1.31) | 1.10 (1.02–1.19) |

TBR: Time below range, TAR: Time above rang; isCGM, intermittently scanned continuous glucose monitoring.

Model 1 adjusted for age and sex

Model 2 adjusted for age, sex, body mass index, symptoms on admission, systolic blood pressure, brain natriuretic peptide, IL-6 and use of glucocorticoid.

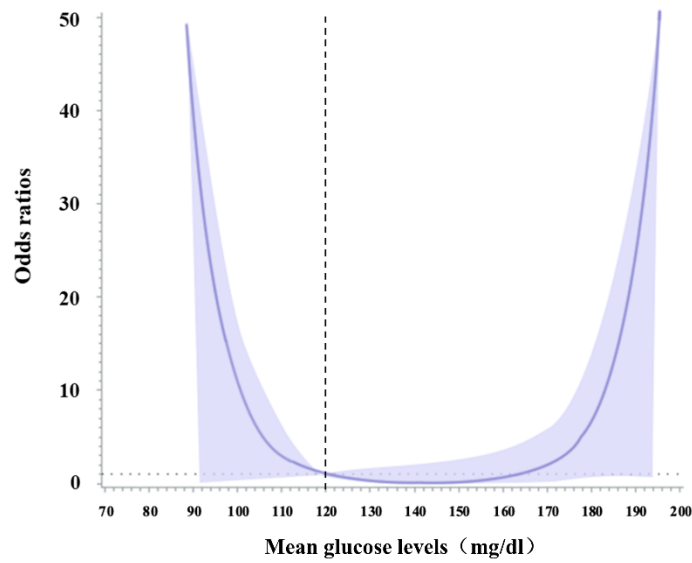

Supplementary Figure S1. The odds ratios of mean glucose levels for composite outcomes among patients with COVID-19. Adjustments were made for age, sex, body mass index, symptoms on admission, systolic blood pressure, brain natriuretic peptide, interleukin-6, and the use of glucocorticoid. Shadows represent 95% confidence intervals.
